# Supplementary material for: Antioxidant capacity of soymilk yogurt and exopolysaccharides produced by lactic acid bacteria
Source: PubMed Central journal article supplement — Biosci Microbiota Food Health. 2019 Mar 22;38(3):97–104. doi: 10.12938/bmfh.18-017 (PMC6663512; doi:10.12938/bmfh.18-017), 2019-03-22
Supplement: bmfh-38-097-s001.pdf [file bmfh-38-097-s001.pdf]

Supplementary Table 1. Breakdown of scores in the comet assay

| Comet score | Control | MYU60 | MYU74 | MYU220 | MYU759 |
|-------------|---------|-------|-------|--------|--------|
| 0           | 0       | 0     | 0     | 0      | 0      |
| 1           | 6       | 16    | 11    | 10     | 15     |
| 2           | 30      | 24    | 16    | 26     | 26     |
| 3           | 42      | 15    | 24    | 30     | 15     |
| 4           | 32      | 8     | 16    | 12     | 4      |
| Total       | 110     | 63    | 67    | 78     | 60     |

A total of 50 cells were counted per slide and scored according to their damage condition (comet score, see Fig. 4a).

Numbers indicate the cumulative value of the score for each comet score.
